# Supplementary material for: Virtual Screening of Repurposed Drugs as Potential Spike Protein Inhibitors of Different SARS-CoV-2 Variants: Molecular Docking Study
Source: MDPI journal article supplement (doi:10.3390/cimb44070208), 2022-07-04
Supplement: s1 [file s1]

**Suppl.1** Potential SARS-CoV-2 S1 glycoprotein repurposed FDA approved Drugs

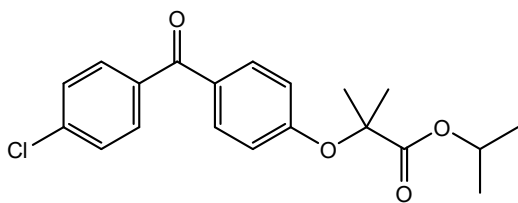

**Fenofibrate**

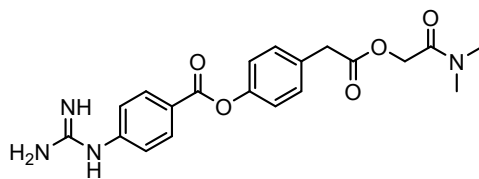

**Camostat**

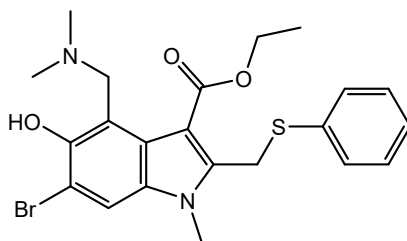

**Umifenovir**

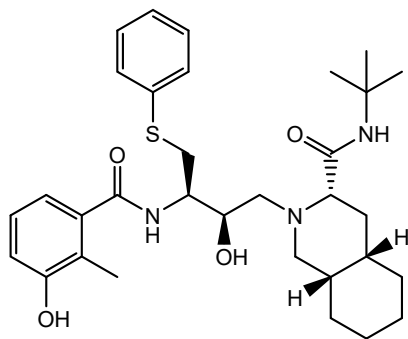

**Nelfinavir**

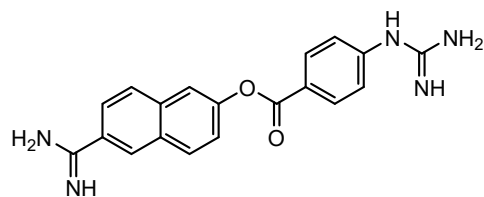

**Nafamostat mesylate**

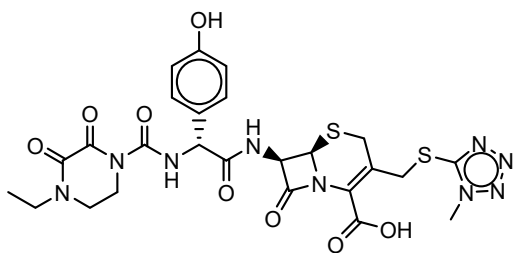

**Cefoperazone**

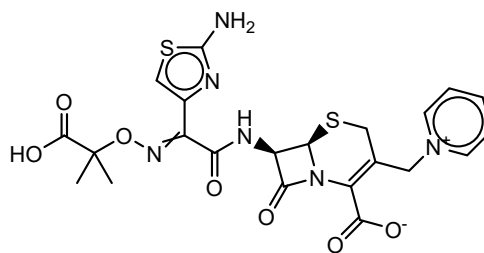

**Ceftazidime**
