# Supplementary material for: Virtual Screening of Repurposed Drugs as Potential Spike Protein Inhibitors of Different SARS-CoV-2 Variants: Molecular Docking Study
Source: MDPI journal article supplement (doi:10.3390/cimb44070208), 2022-07-04
Supplement: s1 [file s1]

**Supplement 2:**

Deduced amino acid sequences of the S1 protein of the different variants used in the current study.

|                                      | 10         | 20         | 30         | 40         | 50         | 60         | 70         | 80         |
|--------------------------------------|------------|------------|------------|------------|------------|------------|------------|------------|
| NC_045512 Wuhan-Hu-1                 | MFVFLVLLPL | VSSQCVNLTT | RTQLPPAYTN | SFTRGVYYPD | KVFRSSVLHS | TQDLFLPFFS | NVTWFHAIHV | SGTNGTKRFD |
| Alpha GRY B.1.1.7 EPI_ISL_679974     | .....      | .....      | .....      | .....      | .....      | .....      | --         | .....      |
| Beta GH B.1.351 EPI_ISL_2447894      | .....      | .....      | .....      | .....      | .....      | .....      | .....      | .....A     |
| Delta GK B.1.617.2 EPI_ISL_3473491   | .....      | .....R.    | .....      | .....      | .....      | .....      | .....      | .....      |
| Gamma GR P.1 EPI_ISL_3218258         | .....      | .....      | .....      | .....      | .....      | .....      | .....      | .....      |
| Lambda GR C37 EPI_ISL_1534645        | .....      | .....      | .....      | .....      | .....      | .....      | .....      | .....      |
| Mu GH UAL90205                       | ...F.....  | .....      | .....      | .....      | .....      | .....      | .....      | .....      |
| Eta G B.1.525 EPI_ISL_760883         | .....      | .....      | .....      | .....      | .....R.    | .....      | V--        | .....      |
| Iota GH B.1.526 EPI_ISL_3364539      | ...F.....  | .....F.    | .....      | .....      | .....      | .....      | .....      | .....      |
| Kappa G B.1.617.1 EPI_ISL_2758215    | .....      | .....      | .....      | .....      | .....      | .....      | .....      | .....      |
| OMICRON B.1.1.529 GR EPI_ISL_6795850 | .....      | .....      | .....      | .....      | .....      | .....      | V--        | .....      |

|                                      | 90         | 100        | 110        | 120       | 130        | 140        | 150        |            |
|--------------------------------------|------------|------------|------------|-----------|------------|------------|------------|------------|
| NC_045512 Wuhan-Hu-1                 | NPVLPFNDGV | YFASTEKSNI | IRGWIFGTTL | DSKTQSLIV | NNATNVVIKV | CEFQFCNDPF | LGV-YYHKNN | KSWMESEFRV |
| Alpha GRY B.1.1.7 EPI_ISL_679974     | .....      | .....      | .....      | .....     | .....      | .....      | --         | .....      |
| Beta GH B.1.351 EPI_ISL_2447894      | .....      | .....      | .....      | .....     | .....      | .....      | -          | .....      |
| Delta GK B.1.617.2 EPI_ISL_3473491   | .....      | .....      | .....      | .....     | .....      | .....      | -          | .....G--   |
| Gamma GR P.1 EPI_ISL_3218258         | .....      | .....      | .....      | .....     | .....      | .....      | -          | .....      |
| Lambda GR C37 EPI_ISL_1534645        | .....      | .....      | .....      | .....     | .....      | .....      | -          | .....T.    |
| Mu GH UAL90205                       | .....      | ...I.....  | .....      | .....     | .....      | .....      | TSN        | .....      |
| Eta G B.1.525 EPI_ISL_760883         | .....      | .....      | .....      | .....     | .....      | .....      | --         | .....      |
| Iota GH B.1.526 EPI_ISL_3364539      | .....      | ...I.....  | .....      | .....     | .....      | .....      | -          | .....      |
| Kappa G B.1.617.1 EPI_ISL_2758215    | .....      | ...I.....  | .....      | .....     | .....      | .....      | D-         | .....      |
| OMICRON B.1.1.529 GR EPI_ISL_6795850 | .....      | ...I.....  | .....      | .....     | .....      | .....      | D---       | .....      |

|                                      | 160        | 170        | 180        | 190        | 200        | 210      | 220   | 230        |            |
|--------------------------------------|------------|------------|------------|------------|------------|----------|-------|------------|------------|
| NC_045512 Wuhan-Hu-1                 | YSSANNCTFE | YVSQPFLMDL | EGKQGNFKNL | REFVFKNIDG | YFKIYSKHTP | INLVR--- | DL    | PQGFSALEPL | VDLPIGINIT |
| Alpha GRY B.1.1.7 EPI_ISL_679974     | .....      | .....      | .....      | .....      | .....      | ---      | ---   | .....      | .....      |
| Beta GH B.1.351 EPI_ISL_2447894      | .....      | .....      | .....      | .....      | .....      | ---      | G     | .....      | .....      |
| Delta GK B.1.617.2 EPI_ISL_3473491   | .....      | .....      | .....      | .....      | .....      | ---      | ..... | V          | .....      |
| Gamma GR P.1 EPI_ISL_3218258         | .....      | .....      | .....      | .....      | .....      | ---      | ..... | .....      | .....      |
| Lambda GR C37 EPI_ISL_1534645        | .....      | .....      | .....      | .....      | .....      | ---      | ..... | .....      | .....      |
| Mu GH UAL90205                       | .....      | .....      | .....      | .....      | .....      | ---      | ..... | .....      | .....      |
| Eta G B.1.525 EPI_ISL_760883         | .....      | .....      | .....      | .....      | .....      | ---      | ..... | .....      | .....      |
| Iota GH B.1.526 EPI_ISL_3364539      | .....      | .....      | .....      | .....      | .....      | ---      | ..... | .....      | .....      |
| Kappa G B.1.617.1 EPI_ISL_2758215    | .....      | .....      | .....      | .....      | .....      | ---      | ..... | .....      | .....      |
| OMICRON B.1.1.529 GR EPI_ISL_6795850 | .....      | .....      | .....      | .....      | .....      | -I       | EPE   | .....      | .....      |

|                                      | 240        | 250        | 260        | 270       | 280        | 290        | 300        | 310        |
|--------------------------------------|------------|------------|------------|-----------|------------|------------|------------|------------|
| NC_045512 Wuhan-Hu-1                 | RFQTLALHR  | SYLTPGDSSS | GWTAGAAAYY | VGYLQPRFL | LKYNENGTIT | DAVDCALDPL | SETKCTLKSF | TVEKGIYQTS |
| Alpha GRY B.1.1.7 EPI_ISL_679974     | .....      | .....      | .....      | .....     | .....      | .....      | .....      | .....      |
| Beta GH  B.1.351_ EPI_ISL_2447894    | ....--.... | .....      | .....      | .....     | .....      | .....      | .....      | .....      |
| Delta GK B.1.617.2 EPI_ISL_3473491   | .....      | .....      | .....      | .....     | .....      | .....      | .....      | .....      |
| Gamma GR P.1 EPI_ISL_3218258         | .....      | .....      | .....      | .....     | .....      | .....      | .....      | .....      |
| Lambda GR C37 EPI_ISL_1534645        | .....      | .....      | .....      | .....     | .....      | .....      | .....      | .....      |
| Mu GH UAL90205                       | .....      | .....      | .....      | .....     | .....      | .....      | .....      | .....      |
| Eta G B.1.525 EPI_ISL_760883         | .....      | .....      | .....      | .....     | .....      | .....      | .....      | .....      |
| Iota GH B.1.526 EPI_ISL_3364539      | .....      | .....G...  | .....      | .....     | .....      | .....      | .....V     | .....      |
| Kappa G B.1.617.1 EPI_ISL_2758215    | .....      | .....      | .....      | .....     | .....      | .....      | .....      | .....      |
| OMICRON B.1.1.529 GR EPI_ISL_6795850 | .....      | .....      | .....      | .....     | .....      | .....      | .....      | .....      |

|                                      | 320        | 330        | 340        | 350        | 360        | 370        | 380        | 390        |
|--------------------------------------|------------|------------|------------|------------|------------|------------|------------|------------|
| NC_045512 Wuhan-Hu-1                 | NFRVQPTESI | VRFPNITNLC | PFGEVFNATR | FASVYAWNRK | RISNCVADYS | VLYNSASFST | FKCYGVSPTK | LNDLCFTNVY |
| Alpha GRY B.1.1.7 EPI_ISL_679974     | .....      | .....      | .....      | .....      | .....      | .....      | .....      | .....      |
| Beta GH  B.1.351_ EPI_ISL_2447894    | .....      | .....      | .....      | .....      | .....      | .....      | .....      | .....      |
| Delta GK B.1.617.2 EPI_ISL_3473491   | .....      | .....      | .....      | .....      | .....      | .....      | .....      | .....      |
| Gamma GR P.1 EPI_ISL_3218258         | .....      | .....      | .....      | .....      | .....      | .....      | .....      | .....      |
| Lambda GR C37 EPI_ISL_1534645        | .....      | .....      | .....      | .....      | .....      | .....      | .....      | .....      |
| Mu GH UAL90205                       | .....      | .....      | .....K     | .....      | .....      | .....      | .....      | .....      |
| Eta G B.1.525 EPI_ISL_760883         | .....      | .....      | .....      | .....      | .....      | .....      | .....      | .....      |
| Iota GH B.1.526 EPI_ISL_3364539      | .....      | .....      | .....      | .....      | .....      | .....      | .....      | .....      |
| Kappa G B.1.617.1 EPI_ISL_2758215    | .....      | .....      | .....      | .....      | .....      | .....      | .....      | .....      |
| OMICRON B.1.1.529 GR EPI_ISL_6795850 | .....      | .....      | ...D.....  | .....      | .....      | ...L.P.F.  | .....      | .....      |

|                                      | 400        | 410        | 420        | 430        | 440        | 450       | 460        | 470        |
|--------------------------------------|------------|------------|------------|------------|------------|-----------|------------|------------|
| NC_045512 Wuhan-Hu-1                 | ADSFVIRGDE | VRQIAPGQTG | KIADYNYKLP | DDFTGCVIAW | NSNNLDSKVG | GNYNLYRLF | RKSNLKPFER | DISTEIYQAG |
| Alpha GRY B.1.1.7 EPI_ISL_679974     | .....      | .....      | .....      | .....      | .....      | .....     | .....      | .....      |
| Beta GH  B.1.351_ EPI_ISL_2447894    | .....      | .....      | N.....     | .....      | .....      | .....     | .....      | .....      |
| Delta GK B.1.617.2 EPI_ISL_3473491   | .....      | .....      | .....      | .....      | .....      | ...R...   | .....      | .....      |
| Gamma GR P.1 EPI_ISL_3218258         | .....      | .....      | .....      | .....      | .....      | .....     | .....      | .....      |
| Lambda GR C37 EPI_ISL_1534645        | .....      | .....      | .....      | .....      | .....      | .....     | .....      | .....      |
| Mu GH UAL90205                       | .....      | .....      | .....      | .....      | .....      | .....     | .....      | .....      |
| Eta G B.1.525 EPI_ISL_760883         | .....      | .....      | .....      | .....      | .....      | .....     | .....      | .....      |
| Iota GH B.1.526 EPI_ISL_3364539      | .....      | .....      | .....      | .....      | .....      | .....     | .....      | .....      |
| Kappa G B.1.617.1 EPI_ISL_2758215    | .....      | .....      | .....      | .....      | .....      | ...R...   | .....      | .....      |
| OMICRON B.1.1.529 GR EPI_ISL_6795850 | .....      | .....      | N.....     | .....      | ...K...S   | .....     | .....      | .....      |

|                                      | 480        | 490        | 500        | 510       | 520        | 530        | 540        | 550        |
|--------------------------------------|------------|------------|------------|-----------|------------|------------|------------|------------|
| NC_045512 Wuhan-Hu-1                 | STPCNGVEGF | NCYFPLQSYG | FQPTNGVGyQ | PYRVVLSFE | LLHAPATVCG | PKKSTNLVKN | KCVNFNFNGL | TGTGVLTESN |
| Alpha GRY B.1.1.7 EPI_ISL_679974     | .....      | .....      | ....Y..... | .....     | .....      | .....      | .....      | .....      |
| Beta GH  B.1.351_ EPI_ISL_2447894    | .....K..   | .....      | ....Y..... | .....     | .....      | .....      | .....      | .....      |
| Delta GK B.1.617.2 EPI_ISL_3473491   | .K.....    | .....      | .....      | .....     | .....      | .....      | .....      | .....      |
| Gamma GR P.1 EPI_ISL_3218258         | .....      | .....      | .....      | .....     | .....      | .....      | .....      | .....      |
| Lambda GR C37 EPI_ISL_1534645        | .....      | .....      | .....      | .....     | .....      | .....      | .....      | .....      |
| Mu GH UAL90205                       | .....K..   | .....      | ....Y..... | .....     | .....      | .....      | .....      | .....      |
| Eta G B.1.525 EPI_ISL_760883         | .....K..   | .....      | .....      | .....     | .....      | .....      | .....      | .....      |
| Iota GH B.1.526 EPI_ISL_3364539      | N.....     | .....      | .....      | .....     | .....      | .....      | .....      | .....      |
| Kappa G B.1.617.1 EPI_ISL_2758215    | .....Q..   | .....      | .....      | .....     | .....      | .....      | .....      | .....      |
| OMICRON B.1.1.529 GR EPI_ISL_6795850 | NK....A..  | .....R..S  | .R..Y...H. | .....     | .....      | .....      | .....      | K.....     |

|                                      | 560        | 570        | 580        | 590        | 600        | 610        | 620        | 630        |
|--------------------------------------|------------|------------|------------|------------|------------|------------|------------|------------|
| NC_045512 Wuhan-Hu-1                 | KKFLPFQQFG | RDIADTTDAV | RDPQTLEILD | ITPCSFQGVs | VITPGTNTSN | QVAVLYQDVN | CTEVPVAIHA | DQLTPTWRVY |
| Alpha GRY B.1.1.7 EPI_ISL_679974     | .....      | ...D.....  | .....      | .....      | .....      | .....G..   | .....      | .....      |
| Beta GH  B.1.351_ EPI_ISL_2447894    | .....      | .....      | .....      | .....      | .....      | .....G..   | .....      | .....      |
| Delta GK B.1.617.2 EPI_ISL_3473491   | .....      | .....      | .....      | .....      | .....      | .....G..   | .....      | .....      |
| Gamma GR P.1 EPI_ISL_3218258         | .....      | .....      | .....      | .....      | .....      | .....G..   | .....      | .....      |
| Lambda GR C37 EPI_ISL_1534645        | .....      | .....      | .....      | .....      | .....      | .....G..   | .....      | .....      |
| Mu GH UAL90205                       | .....      | .....      | .....      | .....      | .....      | .....G..   | .....      | .....      |
| Eta G B.1.525 EPI_ISL_760883         | .....      | .....      | .....      | .....      | .....      | .....G..   | .....      | .....      |
| Iota GH B.1.526 EPI_ISL_3364539      | .....      | .....      | .....      | .....      | .....      | .....G..   | .....      | .....      |
| Kappa G B.1.617.1 EPI_ISL_2758215    | .....      | .....      | .....      | .....      | .....      | .....G..   | .....      | .....      |
| OMICRON B.1.1.529 GR EPI_ISL_6795850 | .....      | .....      | .....      | .....      | .....      | .....G..   | .....      | .....      |

|                                      | 640        | 650        | 660        | 670        | 680        | S2 |
|--------------------------------------|------------|------------|------------|------------|------------|----|
| NC_045512 Wuhan-Hu-1                 | STGSNVFQTR | AGCLIGAEHV | NNSYECDIPI | GAGICASYQT | QTNSPRRARS |    |
| Alpha GRY B.1.1.7 EPI_ISL_679974     | .....      | .....      | .....      | .....      | ....H..... |    |
| Beta GH  B.1.351_ EPI_ISL_2447894    | .....      | .....      | .....      | .....      | .....      |    |
| Delta GK B.1.617.2 EPI_ISL_3473491   | .....      | .....      | .....      | .....      | ....R..... |    |
| Gamma GR P.1 EPI_ISL_3218258         | .....      | .....      | .....      | .....      | .....      |    |
| Lambda GR C37 EPI_ISL_1534645        | .....      | .....      | .....      | .....      | .....      |    |
| Mu GH UAL90205                       | .....      | .....      | .....      | .....      | ....H..... |    |
| Eta G B.1.525 EPI_ISL_760883         | .....      | .....      | .....      | .....      | H.....     |    |
| Iota GH B.1.526 EPI_ISL_3364539      | .....      | .....      | .....      | .....      | .....      |    |
| Kappa G B.1.617.1 EPI_ISL_2758215    | .....      | .....      | .....      | .....      | ....R..... |    |
| OMICRON B.1.1.529 GR EPI_ISL_6795850 | .....      | .....Y.    | .....      | .....      | ..K.H..... |    |
